# Supplementary material for: Application of XRD, SEM-EDX and FTIR techniques for mineral characterization of geological ores
Source: publisher site journal article supplement (doi:10.1515/ract-2024-0335), 2025-03-02
Supplement: Supplementary file 1 [file j_ract-2024-0335_suppl_001.docx]

**Supplementary Information**

**Application of XRD, SEM-EDX and FTIR techniques for mineral**

**characterization of geological ores**

Amina Zafar*, Mohammad Wasim, Tahir Ali, Rashid Nazir Qureshi

*Pakistan Institute of Nuclear Science and Technology (PINSTECH), Islamabad 44000, Pakistan.*

# **Author for correspondence: Amina Zafar (azch87@gmail.com)*

**
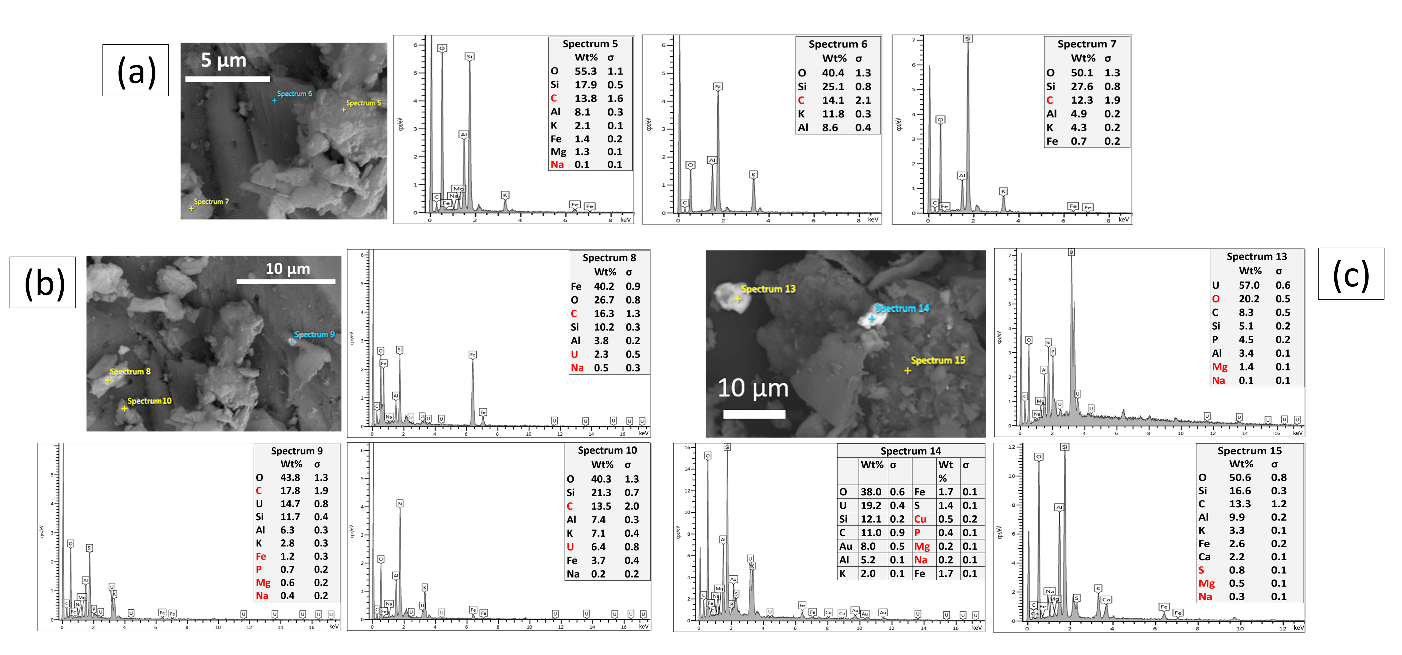
**

**Figure S1:** BSE-EDX analysis of sample S-7

**
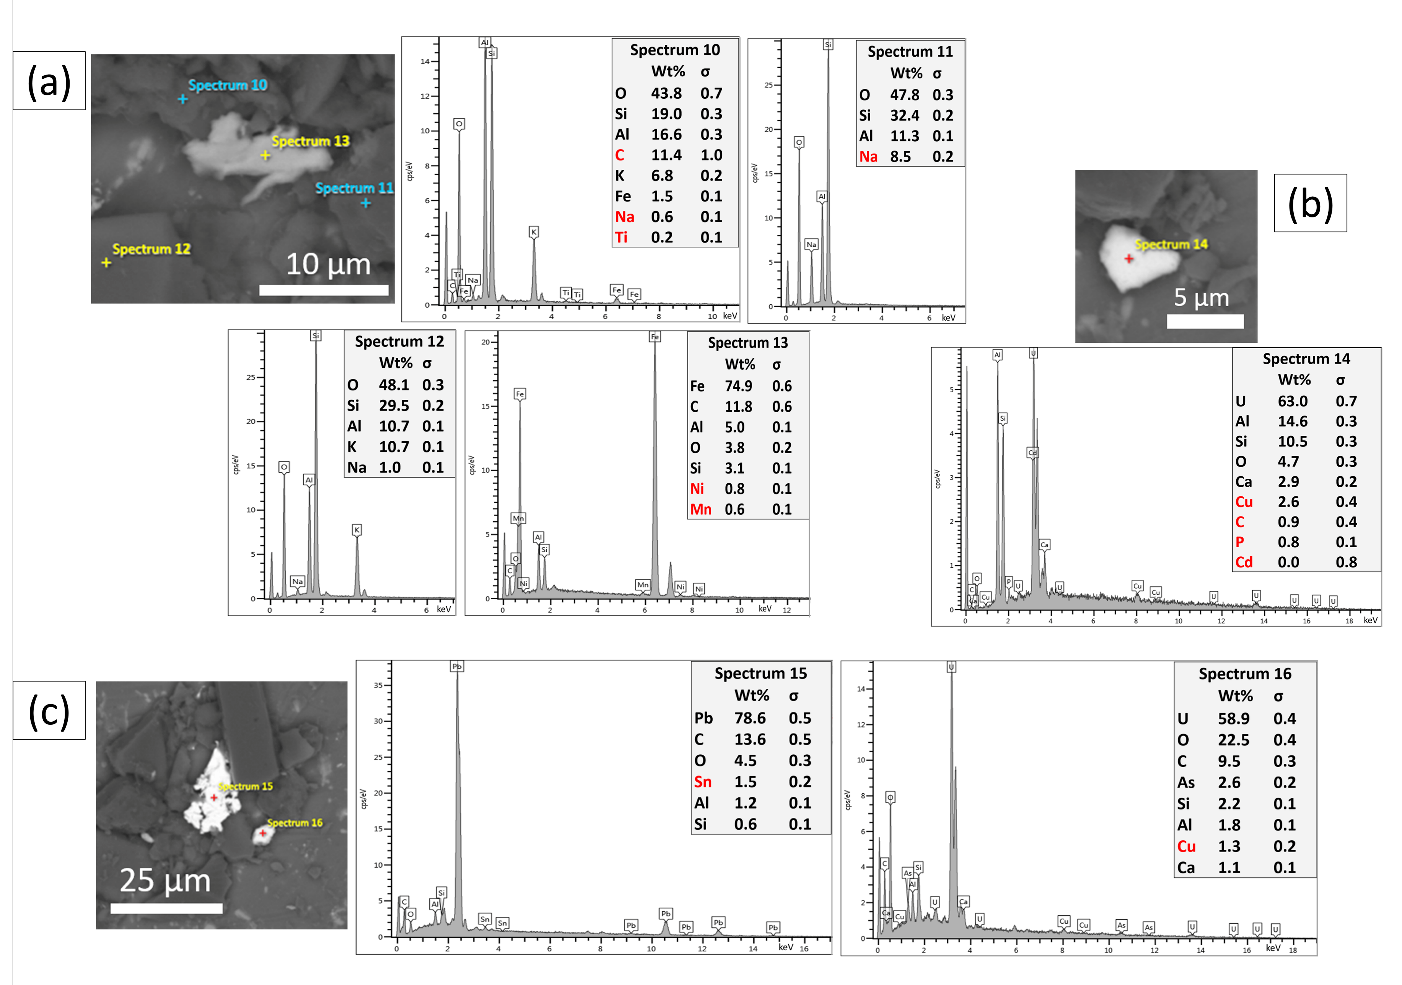
**

**Figure S2:** BSE-EDX analysis of sample S-8

**
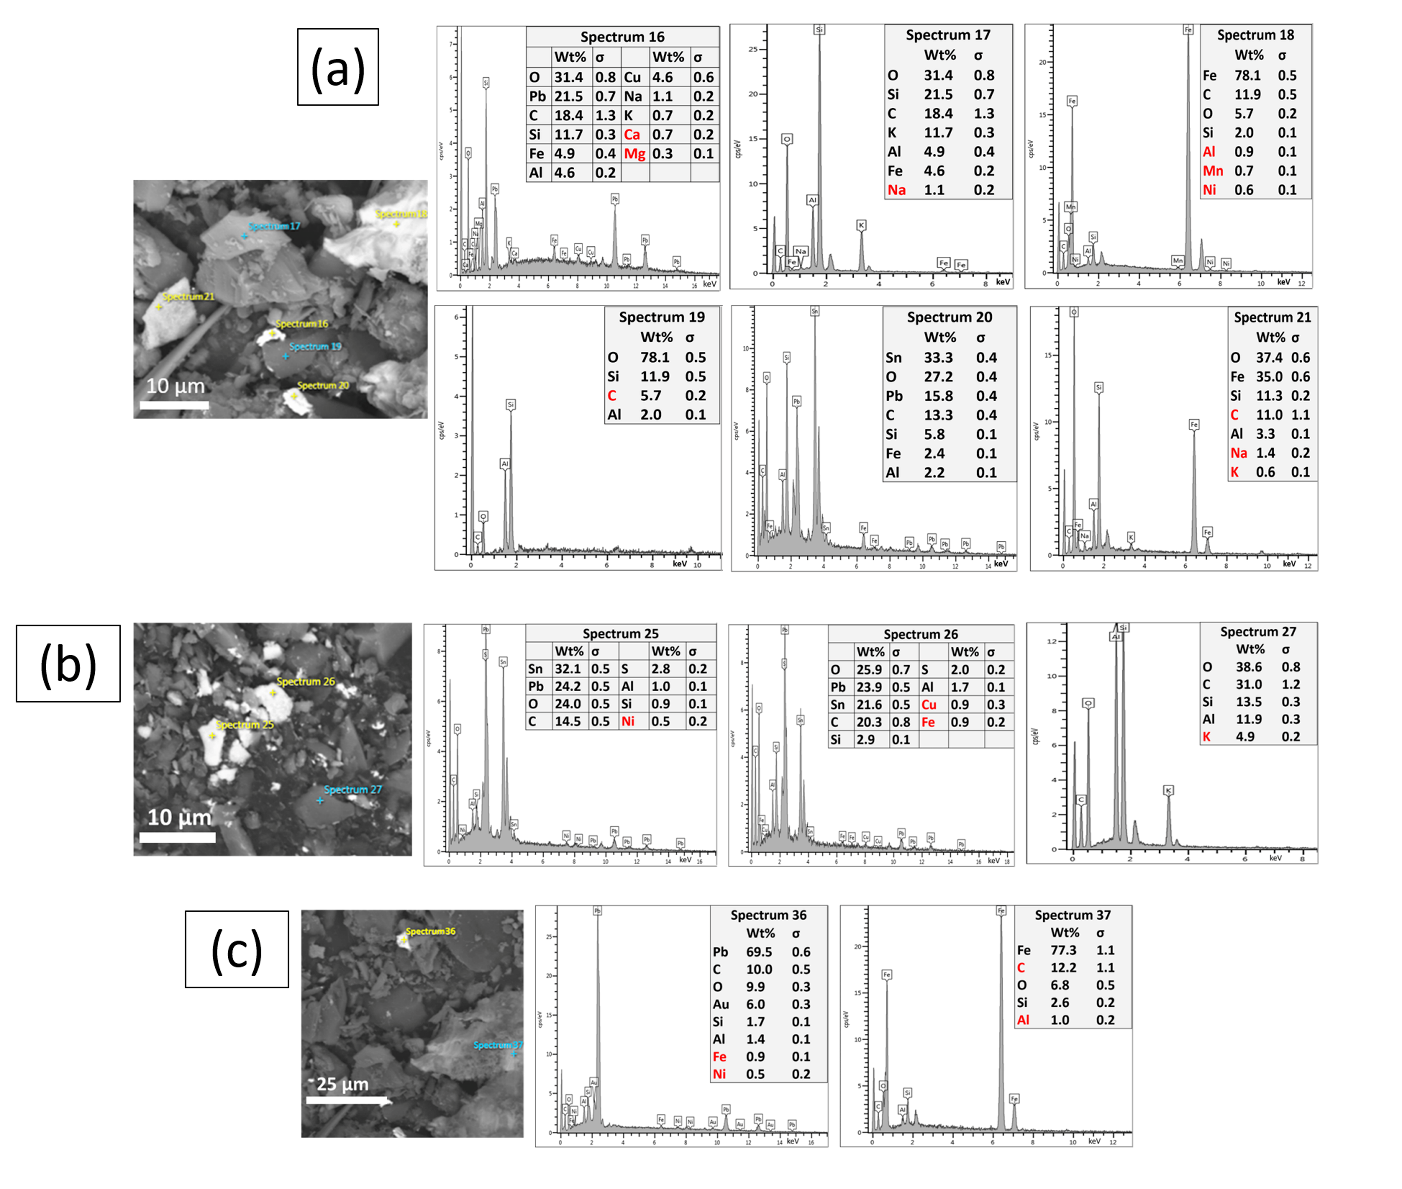
**

**Figure S3:** BSE-EDX analysis of sample S-12

**
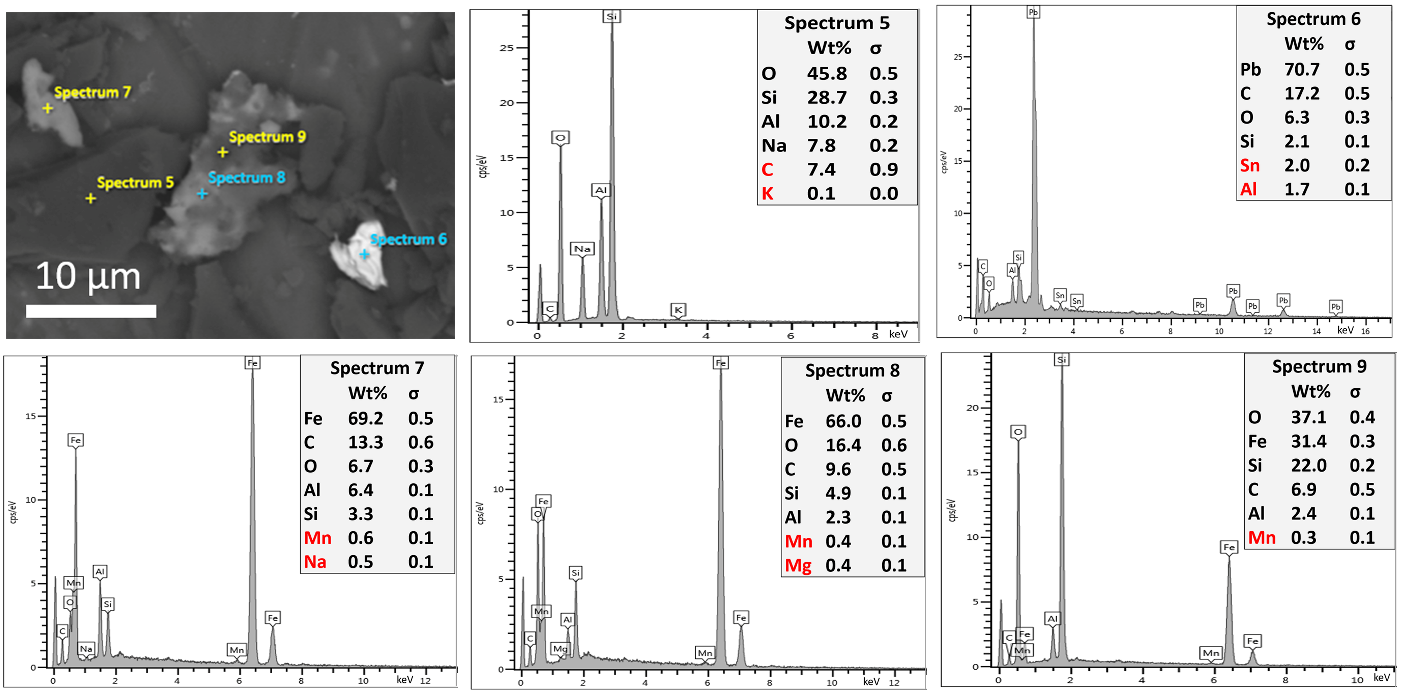
**

**Figure S4:** BSE-EDX analysis of sample S-13


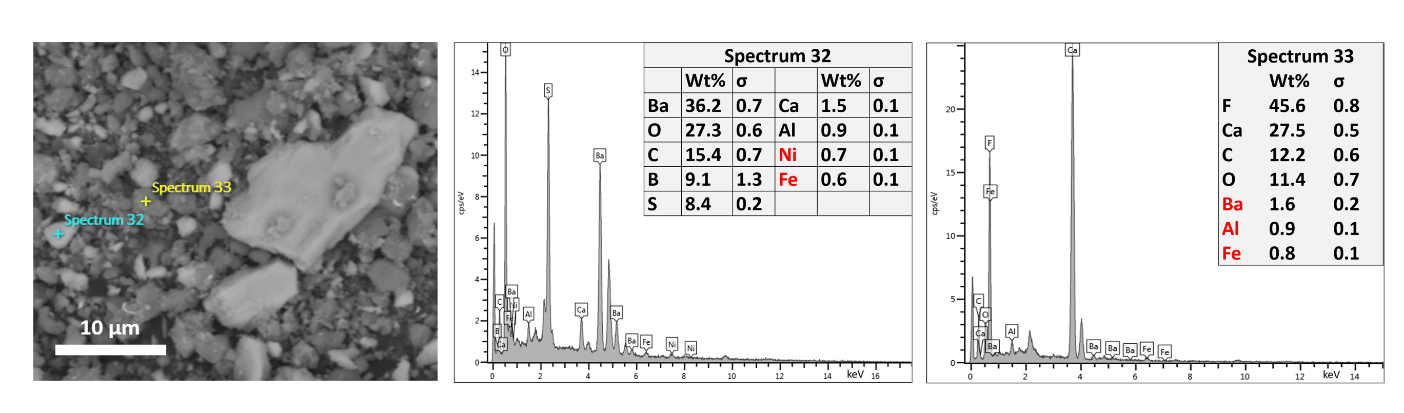


**Figure S5:** BSE-EDX analysis of sample S-15

**
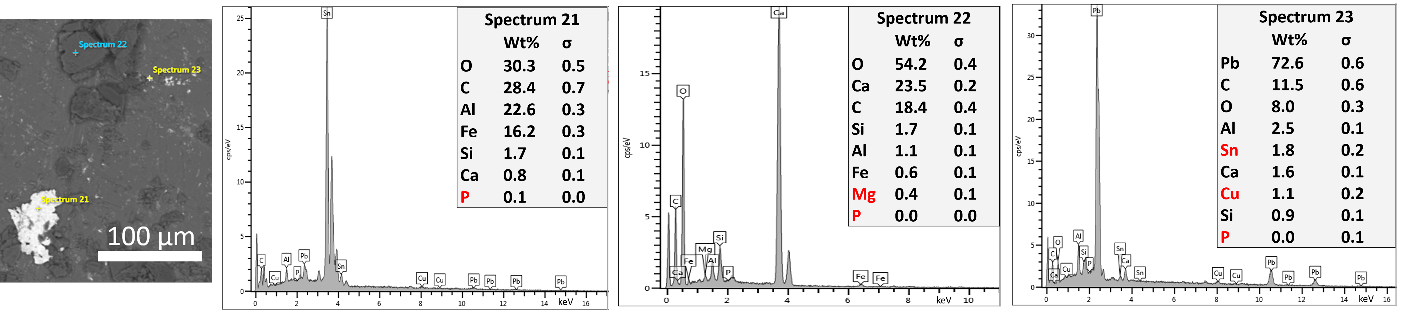
**

**Figure S6:** BSE-EDX analysis of sample S-17

**
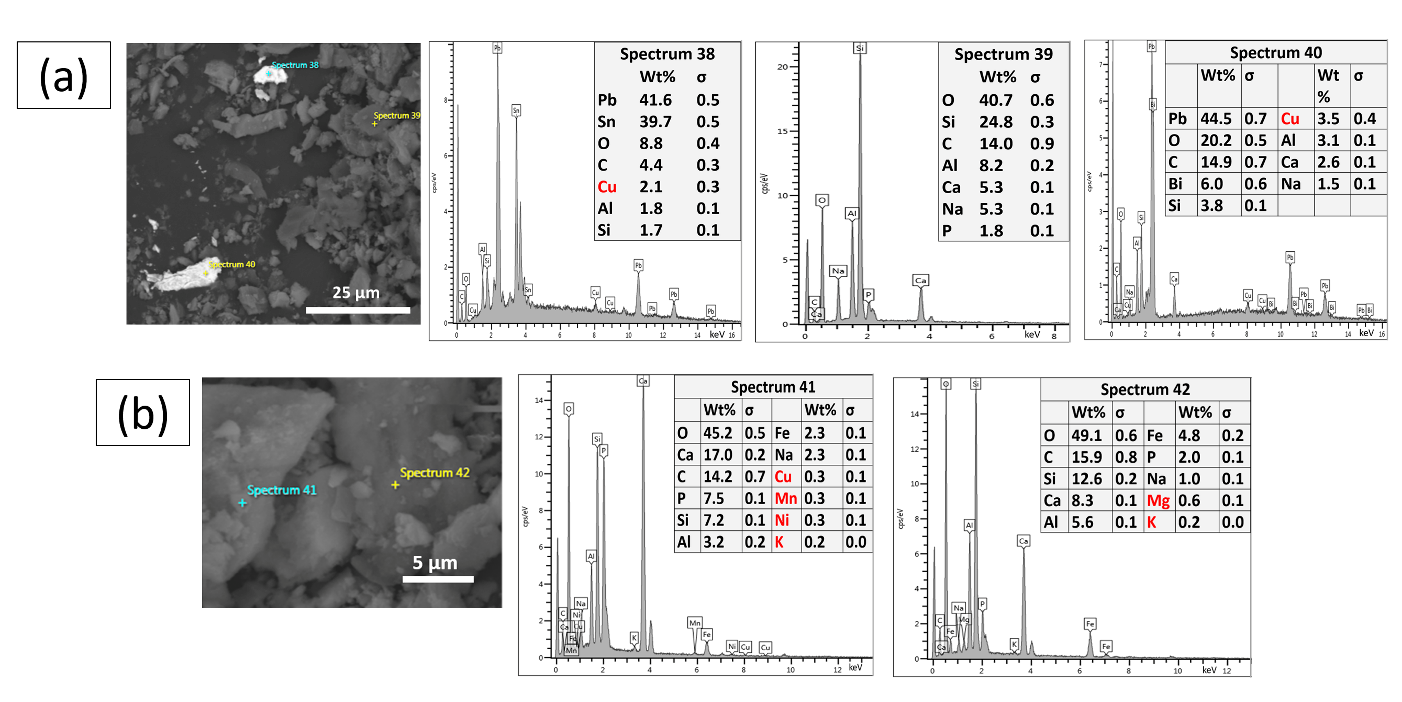
**

**Figure S7(a-b):** BSE-EDX analysis of sample S-18
